# Supplementary material
Source: publisher figshare collection journal article supplement (https://acs.figshare.com/ndownloader/files/3868885)
Supplement: Supplementary file 1 [file 3868885]

 
data_ff5
_publ_requested_category          FO
_publ_contact_author             'Dr. Francesco Capitelli'
_publ_contact_author_address                                                    
;Institute of Crystallography - CNR
Via Salaria Km 29.300
00016 Monterotondo (RM)
Italy
; 
_publ_contact_author_email       'francesco.capitelli@ic.cnr.it'
 
 
_audit_creation_method            SHELXL-97
_chemical_name_systematic
;
 ?
;
_chemical_name_common             ?
_chemical_melting_point           ?
_chemical_formula_moiety          'C30 H24 Br Cl N O2 P'
_chemical_formula_sum
 'C30 H24 Br Cl N O2 P'
_chemical_formula_weight          576.83
 
loop_
 _atom_type_symbol
 _atom_type_description
 _atom_type_scat_dispersion_real
 _atom_type_scat_dispersion_imag
 _atom_type_scat_source
 'C'  'C'   0.0033   0.0016
 'International Tables Vol C Tables 4.2.6.8 and 6.1.1.4'
 'H'  'H'   0.0000   0.0000
 'International Tables Vol C Tables 4.2.6.8 and 6.1.1.4'
 'Cl'  'Cl'   0.1484   0.1585
 'International Tables Vol C Tables 4.2.6.8 and 6.1.1.4'
 'P'  'P'   0.1023   0.0942
 'International Tables Vol C Tables 4.2.6.8 and 6.1.1.4'
 'N'  'N'   0.0061   0.0033
 'International Tables Vol C Tables 4.2.6.8 and 6.1.1.4'
 'O'  'O'   0.0106   0.0060
 'International Tables Vol C Tables 4.2.6.8 and 6.1.1.4'
 'Br'  'Br'  -0.2901   2.4595
 'International Tables Vol C Tables 4.2.6.8 and 6.1.1.4'
 
_symmetry_cell_setting            'Orthorhombic'
_symmetry_space_group_name_H-M    'P212121'
 
loop_
 _symmetry_equiv_pos_as_xyz
 'x, y, z'
 '-x+1/2, -y, z+1/2'
 'x+1/2, -y+1/2, -z'
 '-x, y+1/2, -z+1/2'
 
_cell_length_a                    11.5133(6)
_cell_length_b                    14.2627(16)
_cell_length_c                    16.305(3)
_cell_angle_alpha                 90.00
_cell_angle_beta                  90.00
_cell_angle_gamma                 90.00
_cell_volume                      2677.5(5)
_cell_formula_units_Z             4
_cell_measurement_temperature     293(2)
_cell_measurement_reflns_used     107
_cell_measurement_theta_min       3.82
_cell_measurement_theta_max       17.49
 
_exptl_crystal_description        'Prism'
_exptl_crystal_colour             'Colourless'
_exptl_crystal_size_max           0.11
_exptl_crystal_size_mid           0.04
_exptl_crystal_size_min           0.04
_exptl_crystal_density_meas       ?
_exptl_crystal_density_diffrn     1.431
_exptl_crystal_density_method     'not measured'
_exptl_crystal_F_000              1176
_exptl_absorpt_coefficient_mu     1.723
_exptl_absorpt_correction_type    multi-scan
_exptl_absorpt_correction_T_min   0.8331
_exptl_absorpt_correction_T_max   0.9343
_exptl_absorpt_process_details    'SADABS'

_exptl_special_details
;
 Sheldrick, G. M. SADABS, Absorption Correction Program. 
 University of G�ttingen, Germany, 1996.
; 
 
_diffrn_ambient_temperature       293(2)
_diffrn_radiation_wavelength      0.71073
_diffrn_radiation_type            MoK\a
_diffrn_radiation_source          'fine-focus sealed tube'
_diffrn_radiation_monochromator   graphite
_diffrn_measurement_device_type   ?
_diffrn_measurement_method        ?
_diffrn_detector_area_resol_mean  ?
_diffrn_standards_number          ?
_diffrn_standards_interval_count  ?
_diffrn_standards_interval_time   ?
_diffrn_standards_decay_%         ?
_diffrn_reflns_number             17836
_diffrn_reflns_av_R_equivalents   0.1224
_diffrn_reflns_av_sigmaI/netI     0.1411
_diffrn_reflns_limit_h_min        -13
_diffrn_reflns_limit_h_max        14
_diffrn_reflns_limit_k_min        -17
_diffrn_reflns_limit_k_max        18
_diffrn_reflns_limit_l_min        -21
_diffrn_reflns_limit_l_max        18
_diffrn_reflns_theta_min          5.00
_diffrn_reflns_theta_max          27.51
_reflns_number_total              6003
_reflns_number_gt                 2855
_reflns_threshold_expression      >2sigma(I)
 
_computing_data_collection        'Collect (Nonius, 1998)'
_computing_data_reduction         'EVALCCD (Duisenberg et al., 2003)'
_computing_cell_refinement        'EVALCCD (Duisenberg et al., 2003)'
_computing_structure_solution     'SIR97 (Altomare et al. 1999)'
_computing_structure_refinement   'SHELXL-97 (Sheldrick, 1997)'
_computing_molecular_graphics     'DIAMOND 2.1e (1998-2001 Crystal Impact GbR)'
_computing_publication_material   'SHELXL-97 (Sheldrick, 1997)'  
 
_refine_special_details
;
 Refinement of F^2^ against ALL reflections.  The weighted R-factor wR and
 goodness of fit S are based on F^2^, conventional R-factors R are based
 on F, with F set to zero for negative F^2^. The threshold expression of
 F^2^ > 2sigma(F^2^) is used only for calculating R-factors(gt) etc. and is
 not relevant to the choice of reflections for refinement.  R-factors based
 on F^2^ are statistically about twice as large as those based on F, and R-
 factors based on ALL data will be even larger.
;
 
_refine_ls_structure_factor_coef  Fsqd
_refine_ls_matrix_type            full
_refine_ls_weighting_scheme       calc
_refine_ls_weighting_details
 'calc w=1/[\s^2^(Fo^2^)+(0.0329P)^2^+1.1989P] where P=(Fo^2^+2Fc^2^)/3'
_atom_sites_solution_primary      direct
_atom_sites_solution_secondary    difmap
_atom_sites_solution_hydrogens    geom
_refine_ls_hydrogen_treatment     mixed
_refine_ls_extinction_method      none
_refine_ls_extinction_coef        ?
_refine_ls_abs_structure_details
 'Flack H D (1983), Acta Cryst. A39, 876-881'
_refine_ls_abs_structure_Flack    0.019(16)
_refine_ls_number_reflns          6003
_refine_ls_number_parameters      325
_refine_ls_number_restraints      0
_refine_ls_R_factor_all           0.1727
_refine_ls_R_factor_gt            0.0677
_refine_ls_wR_factor_ref          0.1425
_refine_ls_wR_factor_gt           0.1072
_refine_ls_goodness_of_fit_ref    1.010
_refine_ls_restrained_S_all       1.010
_refine_ls_shift/su_max           0.000
_refine_ls_shift/su_mean          0.000
 
loop_
 _atom_site_label
 _atom_site_type_symbol
 _atom_site_fract_x
 _atom_site_fract_y
 _atom_site_fract_z
 _atom_site_U_iso_or_equiv
 _atom_site_adp_type
 _atom_site_occupancy
 _atom_site_symmetry_multiplicity
 _atom_site_calc_flag
 _atom_site_refinement_flags
 _atom_site_disorder_assembly
 _atom_site_disorder_group
Br1 Br 0.18830(9) 0.07084(6) 0.55589(8) 0.1174(5) Uani 1 1 d . . .
Cl2 Cl -0.11804(16) 0.40499(15) 0.67724(14) 0.0817(7) Uani 1 1 d . . .
P1 P 0.04153(13) 0.55479(12) 0.62021(10) 0.0423(4) Uani 1 1 d . . .
O1 O 0.1131(3) 0.5643(3) 0.5358(2) 0.0465(10) Uani 1 1 d . . .
O2 O -0.0353(4) 0.6333(3) 0.6416(3) 0.0553(12) Uani 1 1 d . . .
N1 N 0.1424(4) 0.5325(3) 0.6889(3) 0.0364(12) Uani 1 1 d . . .
C1 C 0.1427(5) 0.5841(5) 0.7697(4) 0.0481(16) Uani 1 1 d . . .
H1 H 0.0906 0.6380 0.7632 0.058 Uiso 1 1 calc R . .
C2 C 0.2514(5) 0.4877(4) 0.6593(3) 0.0344(13) Uani 1 1 d . . .
H2 H 0.3059 0.4877 0.7055 0.041 Uiso 1 1 calc R . .
C3 C 0.3048(5) 0.5487(3) 0.5924(3) 0.0342(13) Uani 1 1 d . . .
C4 C 0.2320(5) 0.5874(4) 0.5358(4) 0.0392(14) Uani 1 1 d . . .
C5 C 0.2709(6) 0.6481(4) 0.4740(4) 0.0454(16) Uani 1 1 d . . .
H5 H 0.2194 0.6713 0.4351 0.054 Uiso 1 1 calc R . .
C6 C 0.3843(6) 0.6723(4) 0.4718(4) 0.0514(17) Uani 1 1 d . . .
H6 H 0.4102 0.7139 0.4319 0.062 Uiso 1 1 calc R . .
C7 C 0.4639(5) 0.6356(4) 0.5288(4) 0.0456(16) Uani 1 1 d . . .
C8 C 0.5821(6) 0.6605(5) 0.5265(5) 0.066(2) Uani 1 1 d . . .
H8 H 0.6080 0.7019 0.4864 0.079 Uiso 1 1 calc R . .
C9 C 0.6590(6) 0.6253(5) 0.5815(6) 0.074(2) Uani 1 1 d . . .
H9 H 0.7365 0.6436 0.5799 0.089 Uiso 1 1 calc R . .
C10 C 0.6205(5) 0.5608(6) 0.6412(5) 0.066(2) Uani 1 1 d . . .
H10 H 0.6738 0.5356 0.6780 0.079 Uiso 1 1 calc R . .
C11 C 0.5068(5) 0.5346(4) 0.6462(4) 0.0528(18) Uani 1 1 d . . .
H11 H 0.4829 0.4924 0.6862 0.063 Uiso 1 1 calc R . .
C12 C 0.4250(5) 0.5722(4) 0.5897(4) 0.0414(14) Uani 1 1 d . . .
C13 C 0.2341(5) 0.3851(4) 0.6337(4) 0.0375(14) Uani 1 1 d . . .
C14 C 0.1856(6) 0.3201(4) 0.6874(4) 0.0527(17) Uani 1 1 d . . .
H14 H 0.1619 0.3399 0.7392 0.063 Uiso 1 1 calc R . .
C15 C 0.1718(6) 0.2263(4) 0.6658(5) 0.063(2) Uani 1 1 d . . .
H15 H 0.1408 0.1835 0.7028 0.076 Uiso 1 1 calc R . .
C16 C 0.2049(6) 0.1979(4) 0.5883(5) 0.064(2) Uani 1 1 d . . .
C17 C 0.2529(6) 0.2601(4) 0.5336(5) 0.0567(19) Uani 1 1 d . . .
H17 H 0.2752 0.2402 0.4816 0.068 Uiso 1 1 calc R . .
C18 C 0.2677(5) 0.3532(4) 0.5568(4) 0.0510(17) Uani 1 1 d . . .
H18 H 0.3009 0.3951 0.5199 0.061 Uiso 1 1 calc R . .
C19 C 0.2618(5) 0.6235(5) 0.7903(4) 0.0491(17) Uani 1 1 d . . .
C20 C 0.3285(6) 0.5791(5) 0.8492(4) 0.0624(18) Uani 1 1 d . . .
H20 H 0.2988 0.5271 0.8765 0.075 Uiso 1 1 calc R . .
C21 C 0.4418(8) 0.6121(7) 0.8687(5) 0.083(3) Uani 1 1 d . . .
H21 H 0.4851 0.5828 0.9095 0.100 Uiso 1 1 calc R . .
C22 C 0.4858(7) 0.6855(7) 0.8280(6) 0.084(3) Uani 1 1 d . . .
H22 H 0.5610 0.7052 0.8397 0.101 Uiso 1 1 calc R . .
C23 C 0.4208(7) 0.7337(5) 0.7677(5) 0.065(2) Uani 1 1 d . . .
C24 C 0.4669(8) 0.8109(7) 0.7242(7) 0.092(3) Uani 1 1 d . . .
H24 H 0.5421 0.8306 0.7360 0.110 Uiso 1 1 calc R . .
C25 C 0.4064(11) 0.8568(6) 0.6664(7) 0.110(4) Uani 1 1 d . . .
H25 H 0.4396 0.9067 0.6382 0.132 Uiso 1 1 calc R . .
C26 C 0.2920(9) 0.8284(5) 0.6492(5) 0.087(3) Uani 1 1 d . . .
H26 H 0.2488 0.8609 0.6103 0.105 Uiso 1 1 calc R . .
C27 C 0.2443(7) 0.7546(5) 0.6883(5) 0.062(2) Uani 1 1 d . . .
H27 H 0.1686 0.7369 0.6758 0.075 Uiso 1 1 calc R . .
C28 C 0.3073(7) 0.7030(5) 0.7485(4) 0.0527(17) Uani 1 1 d . . .
C29 C 0.0886(7) 0.5213(6) 0.8351(5) 0.090(3) Uani 1 1 d . . .
H29A H 0.0133 0.5009 0.8172 0.135 Uiso 1 1 calc R . .
H29B H 0.0810 0.5557 0.8854 0.135 Uiso 1 1 calc R . .
H29C H 0.1374 0.4677 0.8439 0.135 Uiso 1 1 calc R . .
C30 C -0.0389(5) 0.4508(5) 0.5934(4) 0.0539(17) Uani 1 1 d . . .
H30A H -0.0923 0.4656 0.5493 0.065 Uiso 1 1 calc R . .
H30B H 0.0146 0.4035 0.5736 0.065 Uiso 1 1 calc R . .
 
loop_
 _atom_site_aniso_label
 _atom_site_aniso_U_11
 _atom_site_aniso_U_22
 _atom_site_aniso_U_33
 _atom_site_aniso_U_23
 _atom_site_aniso_U_13
 _atom_site_aniso_U_12
Br1 0.1087(7) 0.0474(4) 0.1963(12) -0.0255(6) 0.0709(8) -0.0202(5)
Cl2 0.0554(11) 0.0944(16) 0.0954(17) 0.0297(13) 0.0142(11) -0.0144(10)
P1 0.0351(8) 0.0504(10) 0.0413(10) 0.0089(8) -0.0009(7) 0.0047(8)
O1 0.042(2) 0.063(3) 0.035(2) 0.013(2) -0.0010(18) -0.004(2)
O2 0.046(2) 0.063(3) 0.057(3) 0.007(2) 0.000(2) 0.021(2)
N1 0.038(3) 0.044(3) 0.028(3) 0.002(2) 0.000(2) 0.007(2)
C1 0.048(4) 0.063(4) 0.033(4) -0.001(3) 0.001(3) 0.011(3)
C2 0.035(3) 0.044(3) 0.023(3) 0.001(3) 0.001(2) 0.007(2)
C3 0.040(3) 0.028(3) 0.035(4) 0.007(3) 0.007(3) 0.002(3)
C4 0.043(3) 0.042(3) 0.033(4) -0.001(3) 0.007(3) -0.004(3)
C5 0.066(4) 0.037(3) 0.034(4) 0.009(3) 0.009(3) 0.001(3)
C6 0.065(5) 0.040(3) 0.049(5) 0.000(3) 0.021(4) -0.006(3)
C7 0.045(4) 0.035(3) 0.057(5) -0.008(3) 0.019(3) -0.008(3)
C8 0.050(4) 0.052(4) 0.095(7) -0.005(4) 0.031(4) -0.016(3)
C9 0.040(4) 0.061(5) 0.122(8) -0.009(5) 0.014(5) -0.009(4)
C10 0.043(4) 0.066(5) 0.089(6) -0.007(5) 0.003(4) 0.013(4)
C11 0.039(4) 0.049(4) 0.070(5) 0.003(3) 0.003(3) 0.003(3)
C12 0.040(3) 0.033(3) 0.051(4) -0.010(3) 0.015(3) 0.002(3)
C13 0.033(3) 0.034(3) 0.045(4) 0.006(3) 0.002(3) 0.004(2)
C14 0.058(4) 0.042(4) 0.058(5) 0.011(3) 0.012(4) 0.002(3)
C15 0.053(4) 0.045(4) 0.092(6) 0.013(4) 0.022(4) -0.004(3)
C16 0.052(4) 0.041(4) 0.099(7) 0.001(4) 0.022(4) -0.007(3)
C17 0.068(5) 0.043(4) 0.059(5) -0.004(4) 0.012(4) -0.004(3)
C18 0.059(4) 0.037(3) 0.057(5) 0.008(3) 0.006(4) 0.002(3)
C19 0.051(4) 0.060(4) 0.036(4) -0.010(3) 0.001(3) 0.015(3)
C20 0.069(5) 0.072(4) 0.045(4) -0.006(4) -0.005(4) 0.005(4)
C21 0.089(7) 0.102(7) 0.059(6) -0.012(5) -0.024(5) 0.019(5)
C22 0.067(5) 0.101(7) 0.084(7) -0.019(6) -0.025(5) 0.008(5)
C23 0.063(5) 0.063(5) 0.069(6) -0.016(4) -0.001(4) -0.010(4)
C24 0.083(6) 0.083(6) 0.110(8) -0.021(6) -0.021(6) -0.029(5)
C25 0.151(10) 0.070(6) 0.109(9) 0.004(6) -0.019(8) -0.053(6)
C26 0.138(8) 0.038(4) 0.085(7) -0.005(4) -0.034(6) -0.004(5)
C27 0.086(5) 0.044(4) 0.058(5) -0.008(4) -0.020(4) -0.005(4)
C28 0.062(4) 0.055(4) 0.040(5) -0.013(4) -0.005(4) 0.006(4)
C29 0.087(6) 0.137(8) 0.046(5) 0.009(5) 0.013(4) -0.027(5)
C30 0.041(3) 0.068(4) 0.052(4) 0.015(4) -0.005(3) -0.007(3)
 
_geom_special_details
;
 All esds (except the esd in the dihedral angle between two l.s. planes)
 are estimated using the full covariance matrix.  The cell esds are taken
 into account individually in the estimation of esds in distances, angles
 and torsion angles; correlations between esds in cell parameters are only
 used when they are defined by crystal symmetry.  An approximate (isotropic)
 treatment of cell esds is used for estimating esds involving l.s. planes.
;
 
loop_
 _geom_bond_atom_site_label_1
 _geom_bond_atom_site_label_2
 _geom_bond_distance
 _geom_bond_site_symmetry_2
 _geom_bond_publ_flag
Br1 C16 1.898(7) . ?
Cl2 C30 1.768(6) . ?
P1 O2 1.469(4) . ?
P1 O1 1.610(4) . ?
P1 N1 1.644(5) . ?
P1 C30 1.802(6) . ?
O1 C4 1.408(6) . ?
N1 C2 1.489(6) . ?
N1 C1 1.509(7) . ?
C1 C19 1.520(8) . ?
C1 C29 1.526(9) . ?
C1 H1 0.9800 . ?
C2 C3 1.525(7) . ?
C2 C13 1.536(7) . ?
C2 H2 0.9800 . ?
C3 C4 1.363(8) . ?
C3 C12 1.424(7) . ?
C4 C5 1.402(8) . ?
C5 C6 1.351(8) . ?
C5 H5 0.9300 . ?
C6 C7 1.405(9) . ?
C6 H6 0.9300 . ?
C7 C8 1.406(9) . ?
C7 C12 1.417(8) . ?
C8 C9 1.357(10) . ?
C8 H8 0.9300 . ?
C9 C10 1.411(10) . ?
C9 H9 0.9300 . ?
C10 C11 1.363(8) . ?
C10 H10 0.9300 . ?
C11 C12 1.422(8) . ?
C11 H11 0.9300 . ?
C13 C18 1.388(9) . ?
C13 C14 1.392(8) . ?
C14 C15 1.393(8) . ?
C14 H14 0.9300 . ?
C15 C16 1.380(10) . ?
C15 H15 0.9300 . ?
C16 C17 1.373(9) . ?
C17 C18 1.391(8) . ?
C17 H17 0.9300 . ?
C18 H18 0.9300 . ?
C19 C20 1.383(8) . ?
C19 C28 1.423(9) . ?
C20 C21 1.422(10) . ?
C20 H20 0.9300 . ?
C21 C22 1.340(11) . ?
C21 H21 0.9300 . ?
C22 C23 1.414(11) . ?
C22 H22 0.9300 . ?
C23 C24 1.413(12) . ?
C23 C28 1.414(10) . ?
C24 C25 1.342(12) . ?
C24 H24 0.9300 . ?
C25 C26 1.405(13) . ?
C25 H25 0.9300 . ?
C26 C27 1.348(10) . ?
C26 H26 0.9300 . ?
C27 C28 1.424(9) . ?
C27 H27 0.9300 . ?
C29 H29A 0.9600 . ?
C29 H29B 0.9600 . ?
C29 H29C 0.9600 . ?
C30 H30A 0.9700 . ?
C30 H30B 0.9700 . ?
 
loop_
 _geom_angle_atom_site_label_1
 _geom_angle_atom_site_label_2
 _geom_angle_atom_site_label_3
 _geom_angle
 _geom_angle_site_symmetry_1
 _geom_angle_site_symmetry_3
 _geom_angle_publ_flag
O2 P1 O1 116.5(2) . . ?
O2 P1 N1 114.2(3) . . ?
O1 P1 N1 103.7(2) . . ?
O2 P1 C30 112.1(3) . . ?
O1 P1 C30 97.2(3) . . ?
N1 P1 C30 111.7(3) . . ?
C4 O1 P1 121.2(4) . . ?
C2 N1 C1 119.3(4) . . ?
C2 N1 P1 117.2(4) . . ?
C1 N1 P1 120.2(4) . . ?
N1 C1 C19 112.0(5) . . ?
N1 C1 C29 108.8(5) . . ?
C19 C1 C29 115.5(6) . . ?
N1 C1 H1 106.6 . . ?
C19 C1 H1 106.6 . . ?
C29 C1 H1 106.6 . . ?
N1 C2 C3 109.1(4) . . ?
N1 C2 C13 112.8(4) . . ?
C3 C2 C13 113.6(5) . . ?
N1 C2 H2 107.0 . . ?
C3 C2 H2 107.0 . . ?
C13 C2 H2 107.0 . . ?
C4 C3 C12 118.8(5) . . ?
C4 C3 C2 117.9(5) . . ?
C12 C3 C2 123.2(5) . . ?
C3 C4 C5 122.7(5) . . ?
C3 C4 O1 120.2(5) . . ?
C5 C4 O1 117.0(6) . . ?
C6 C5 C4 119.0(6) . . ?
C6 C5 H5 120.5 . . ?
C4 C5 H5 120.5 . . ?
C5 C6 C7 121.2(6) . . ?
C5 C6 H6 119.4 . . ?
C7 C6 H6 119.4 . . ?
C8 C7 C6 121.3(6) . . ?
C8 C7 C12 119.1(7) . . ?
C6 C7 C12 119.6(6) . . ?
C9 C8 C7 121.3(7) . . ?
C9 C8 H8 119.3 . . ?
C7 C8 H8 119.3 . . ?
C8 C9 C10 119.5(6) . . ?
C8 C9 H9 120.2 . . ?
C10 C9 H9 120.2 . . ?
C11 C10 C9 121.4(7) . . ?
C11 C10 H10 119.3 . . ?
C9 C10 H10 119.3 . . ?
C10 C11 C12 119.6(6) . . ?
C10 C11 H11 120.2 . . ?
C12 C11 H11 120.2 . . ?
C7 C12 C11 119.0(5) . . ?
C7 C12 C3 118.6(6) . . ?
C11 C12 C3 122.4(6) . . ?
C18 C13 C14 117.5(5) . . ?
C18 C13 C2 121.5(5) . . ?
C14 C13 C2 121.0(6) . . ?
C13 C14 C15 121.7(6) . . ?
C13 C14 H14 119.2 . . ?
C15 C14 H14 119.2 . . ?
C16 C15 C14 118.8(6) . . ?
C16 C15 H15 120.6 . . ?
C14 C15 H15 120.6 . . ?
C17 C16 C15 121.1(6) . . ?
C17 C16 Br1 118.5(6) . . ?
C15 C16 Br1 120.4(5) . . ?
C16 C17 C18 119.3(7) . . ?
C16 C17 H17 120.4 . . ?
C18 C17 H17 120.4 . . ?
C13 C18 C17 121.6(6) . . ?
C13 C18 H18 119.2 . . ?
C17 C18 H18 119.2 . . ?
C20 C19 C28 119.6(6) . . ?
C20 C19 C1 119.0(6) . . ?
C28 C19 C1 121.4(6) . . ?
C19 C20 C21 120.8(8) . . ?
C19 C20 H20 119.6 . . ?
C21 C20 H20 119.6 . . ?
C22 C21 C20 119.7(8) . . ?
C22 C21 H21 120.2 . . ?
C20 C21 H21 120.2 . . ?
C21 C22 C23 121.7(8) . . ?
C21 C22 H22 119.2 . . ?
C23 C22 H22 119.2 . . ?
C24 C23 C28 118.6(8) . . ?
C24 C23 C22 121.9(8) . . ?
C28 C23 C22 119.5(8) . . ?
C25 C24 C23 122.4(8) . . ?
C25 C24 H24 118.8 . . ?
C23 C24 H24 118.8 . . ?
C24 C25 C26 119.1(9) . . ?
C24 C25 H25 120.4 . . ?
C26 C25 H25 120.4 . . ?
C27 C26 C25 120.8(9) . . ?
C27 C26 H26 119.6 . . ?
C25 C26 H26 119.6 . . ?
C26 C27 C28 121.5(8) . . ?
C26 C27 H27 119.3 . . ?
C28 C27 H27 119.3 . . ?
C23 C28 C27 117.6(7) . . ?
C23 C28 C19 118.8(7) . . ?
C27 C28 C19 123.7(7) . . ?
C1 C29 H29A 109.5 . . ?
C1 C29 H29B 109.5 . . ?
H29A C29 H29B 109.5 . . ?
C1 C29 H29C 109.5 . . ?
H29A C29 H29C 109.5 . . ?
H29B C29 H29C 109.5 . . ?
Cl2 C30 P1 112.5(4) . . ?
Cl2 C30 H30A 109.1 . . ?
P1 C30 H30A 109.1 . . ?
Cl2 C30 H30B 109.1 . . ?
P1 C30 H30B 109.1 . . ?
H30A C30 H30B 107.8 . . ?
 
loop_
 _geom_hbond_atom_site_label_D
 _geom_hbond_atom_site_label_H
 _geom_hbond_atom_site_label_A
 _geom_hbond_distance_DH
 _geom_hbond_distance_HA
 _geom_hbond_distance_DA
 _geom_hbond_angle_DHA
 _geom_hbond_site_symmetry_A
C27 H27 O2  0.93 2.83 3.733(9) 164.2 .
C6 H6 O2  0.93 2.56 3.459(8) 161.4 3_566
C9 H9 O2  0.93 2.82 3.656(9) 150.5 1_655
C15 H15 O2  0.93 2.90 3.754(9) 152.9 4_546
 
_diffrn_measured_fraction_theta_max    0.982
_diffrn_reflns_theta_full              27.51
_diffrn_measured_fraction_theta_full   0.982
_refine_diff_density_max    0.476
_refine_diff_density_min   -0.556
_refine_diff_density_rms    0.063
